# Supplementary material for: Genes Responsive to Low-Intensity Pulsed Ultrasound in MC3T3-E1 Preosteoblast Cells
Source: PubMed Central journal article supplement (PMC3856087; doi:10.3390/ijms141122721), 2013-11-18
Supplement: ijms-14-22721-s001.pdf [file ijms-14-22721-s001.pdf]

## Supplementary Information

**Table S1.** Functionally annotated genes and top five biological functions in upregulated probe sets.

| Name                                                  | <i>p</i> -value   | Genes (number of genes)                                                                                                                                                                                          |
|-------------------------------------------------------|-------------------|------------------------------------------------------------------------------------------------------------------------------------------------------------------------------------------------------------------|
| All functionally annotated genes                      |                   | <i>ADH1C, AHR, APOD, C2orf40, CCRL1, CD200, CRABP1, DACT1, DIO2, DMP1, EGR3, F13A1, FBNI, GAS6, HTRA1, IGF2, LUM, Lyz1/Lyz2, MMP13, MYLK, NR4A1, NREP, OMD, PADI2, PLAGL1, PLEKHA6, SIAH2, THBS1, TNNC1</i> (29) |
| Skeletal and muscular system development and function | 5.26E-07-1.80E-02 | <i>AHR, APOD, CD200, DACT1, DMP1, EGR3, FBNI, GAS6, IGF2, LUM, MMP13, MYLK, NR4A1, PLAGL1, THBS1, TNNC1</i> (16)                                                                                                 |
| Cellular movement                                     | 5.30E-06-1.80E-02 | <i>AHR, CCRL1, CD200, DMP1, F13A1, FBNI, GAS6, HTRA1, IGF2, LUM, Lyz1/Lyz2, MMP13, MYLK, NR4A1, NREP, SIAH2, THBS1</i> (17)                                                                                      |
| Connective tissue development and function            | 3.08E-05-1.80E-02 | <i>AHR, DACT1, DMP1, FBNI, GAS6, IGF2, LUM, MMP13, NR4A1, PLAGL1, SIAH2, THBS1</i> (12)                                                                                                                          |
| Embryonic development                                 | 3.08E-05-1.80E-02 | <i>AHR, DACT1, DIO2, DMP1, EGR3, FBNI, GAS6, IGF2, LUM, MMP13, MYLK, NR4A1, PLAGL1, THBS1</i> (14)                                                                                                               |
| Organ development                                     | 3.08E-05-1.80E-02 | <i>AHR, DACT1, DIO2, DMP1, EGR3, FBNI, GAS6, IGF2, LUM, MMP13, MYLK, PLAGL1, THBS1</i> (13)                                                                                                                      |

**Table S2.** Functionally annotated genes and top five biological functions in downregulated probe sets.

| Name                                       | <i>p</i> -value   | Genes (number of genes)                                                                                                                                                                                   |
|--------------------------------------------|-------------------|-----------------------------------------------------------------------------------------------------------------------------------------------------------------------------------------------------------|
| All functionally annotated genes           |                   | <i>ANXA8L2, BLNK, C15orf48, CDA, CDH1, CEACAM1, CTHRC1, DDR1, GATM, GCAT, GPAA1, HSPA4L, ID1, ID2, ID3, INPP5K, KIF20B, KIF2C, KITLG, KRT14, NQO1, SOSTDC1, TGFBI, TMCC3, TMEFF2, TRIM29, ZDHHC2</i> (27) |
| Gene expression                            | 1.43E-08-8.01E-03 | <i>ID1, ID2, ID3, KITLG</i> (4)                                                                                                                                                                           |
| Cell cycle                                 | 7.95E-07-1.99E-02 | <i>BLNK, CDH1, CEACAM1, ID1, ID2, ID3, KIF20B, KIF2C, KITLG, KRT14</i> (10)                                                                                                                               |
| Connective tissue development and function | 7.95E-07-1.74E-02 | <i>CDH1, CEACAM1, ID1, ID2, ID3, KITLG, NQO1</i> (7)                                                                                                                                                      |

**Table S2. Cont.**

| Name                              | p-value           | Genes (number of genes)                                                                                                           |
|-----------------------------------|-------------------|-----------------------------------------------------------------------------------------------------------------------------------|
| Cellular development              | 1.19E-06-2.20E-02 | <i>BLNK, CDH1, CEACAM1, CTHRC1, DDR1, GCAT, ID1, ID2, ID3, INPP5K, KITLG, KRT14, NQO1, SOSTDC1, TGFBI, TMEFF2</i> (16)            |
| Cellular growth and proliferation | 1.19E-06-2.20E-02 | <i>BLNK, CDA, CDH1, CEACAM1, CTHRC1, DDR1, GCAT, ID1, ID2, ID3, INPP5K, KIF20B, KIF2C, KITLG, KRT14, NQO1, TGFBI, TMEFF2</i> (18) |

**Table S3. Nucleotide sequences of primers and a probe for target genes.**

| Genes        | Orientation | Nucleotide sequence (5' to 3')      | GenBank accession No. |
|--------------|-------------|-------------------------------------|-----------------------|
| <i>Ahr</i>   | Sense       | gtcacagcagatgccttggt                | NM_013464             |
|              | Antisense   | ccttgtagcagagtctggggt               |                       |
| <i>Bglap</i> | Sense       | ctctgacctcacagatgcca                | NM_007541             |
|              | Antisense   | ttttaggcggctctcaagc                 |                       |
| <i>Cd200</i> | Sense       | aaaggcgctgcacacaactg                | NM_010818             |
|              | Antisense   | gttttctgggctcacggcttc               |                       |
| <i>Egr3</i>  | Sense       | atgggctccattccggaaca                | NM_018781             |
|              | Antisense   | aatcccgggtggatctgctt                |                       |
| <i>GAPDH</i> | Sense       | tcggtgtgaacggattggc                 | NM_008084             |
|              | Antisense   | gtgccgttgaattgccgtg                 |                       |
| <i>Gas6</i>  | Sense       | tctggcagttgaggatg                   | NM_019521             |
|              | Antisense   | gccatccacttctagggt                  |                       |
| <i>Htra1</i> | Sense       | tgacagagtcccacgatcgaca              | NM_019564             |
|              | Antisense   | ccacagactgtccgttgatgct              |                       |
| <i>Id1</i>   | Sense       | gaacgtcctgctctacgaca                | NM_010495             |
|              | Antisense   | ccgacttcagactccgagtt                |                       |
| <i>Id2</i>   | Sense       | gactgcaccccactatcgtca               | NM_010496             |
|              | Antisense   | caggatgctgatgtccgtgttc              |                       |
| <i>Id3</i>   | Sense       | cctcttgacgacatgaaccac               | NM_008321             |
|              | Antisense   | gtggcaaaagctcctctgtcc               |                       |
| <i>Igf2</i>  | Sense       | gggtgtaaacacgatcagacgactccccagatacc | NM_010514             |
|              | Antisense   |                                     |                       |
| <i>Lum</i>   | Sense       | cacagctaccaactgccatgt               | NM_008524             |
|              | Antisense   | cactgcaggtctgtgacgttct              |                       |
| <i>Matn4</i> | Sense       | gccaaagaggaaggcatcgta               | NM_013592             |
|              | Antisense   | ccggagaataggacacgtgcaa              |                       |
| <i>Mylk</i>  | Sense       | ccatccgtgatctggaagtcgt              | NM_139300             |
|              | Antisense   | cagttgccgtcttcgtcgtagt              |                       |
| <i>Nrep</i>  | Sense       | gtcagccaagaaccgtttg                 | NM_053078             |
|              | Antisense   | actggtagctggagaggtga                |                       |
| <i>Omd</i>   | Sense       | gtgagcagaggagtactaacgg              | NM_012050             |
|              | Antisense   | cctgactgtcatggtcgtct                |                       |

Table S3. Cont.

| Genes         | Orientation | Nucleotide sequence (5' to 3')                                   | GenBank accession No. |
|---------------|-------------|------------------------------------------------------------------|-----------------------|
| <i>Spp1</i>   | Sense       | ggacctcacctctcacatgaaga                                          | NM_009263             |
|               | Antisense   | agacttgggtcatccagctgact                                          |                       |
|               | Probe       | FAM <sup>TM</sup> -cagcttctgagcatgcctctgatca-TAMRA <sup>TM</sup> |                       |
| <i>Thbs1</i>  | Sense       | acaggtgtgcaaaccgcgaaac                                           | NM_011580             |
|               | Antisense   | tgatgccattgcctgcatagcc                                           |                       |
| <i>Tnnc1</i>  | Sense       | gttcggtgcatgaaggacgaca                                           | NM_009393             |
|               | Antisense   | tggcctgcagcatcatcttcag                                           |                       |
| <i>Znhit6</i> | Sense       | agtcacagactggggtccaa                                             | NM_001081094          |
|               | Antisense   | cctctcaacaccacgtgcaa                                             |                       |

**Figure S1.** Venn diagram of probe sets that were differentially expressed. Cells were exposed to LIPUS (30 mW/cm<sup>2</sup>, for 20 min), followed by culturing at 37 °C for six (A and B) and 12 h (C and D). Gene expression analysis of the probe sets that were upregulated (A and C) and downregulated (B and D) by a factor of 1.5 or greater was conducted using GeneSpring® software. The diagram shows the number of specifically and commonly expressed probe sets affected by LIPUS. The experiments were repeated three times.

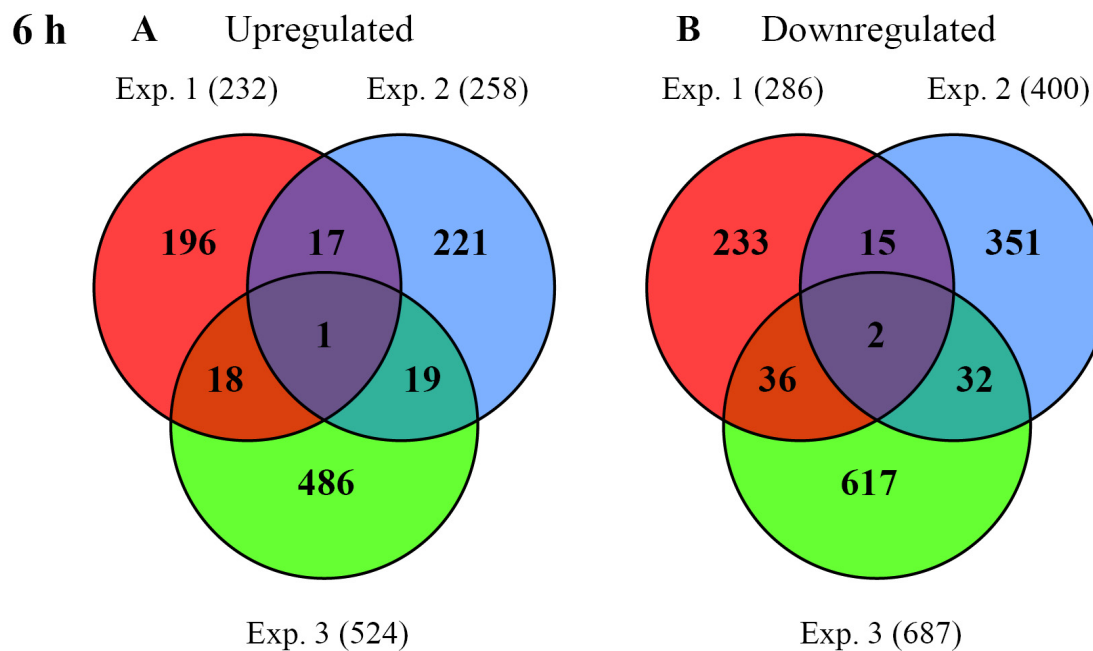

Figure S1. Cont.

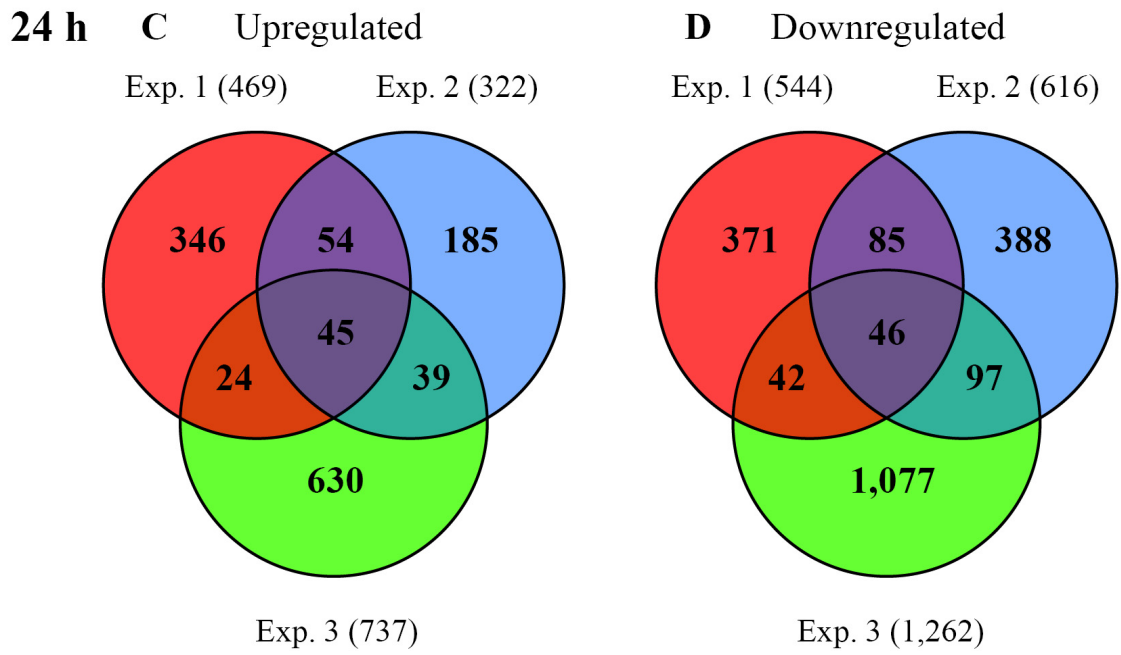

© 2013 by the authors; licensee MDPI, Basel, Switzerland. This article is an open access article distributed under the terms and conditions of the Creative Commons Attribution license (<http://creativecommons.org/licenses/by/3.0/>).
